# Supplementary material for: Dual role of the reactant MOH (M=Li, Na or K) in the growth of ZnO quantum dots under a sol–gel process: promoter and inhibitor
Source: Royal Society of Chemistry journal article supplement (doi:10.1039/c6ra06660g), 2016-01-01
Supplement: c6ra06660g1.pdf [file c6ra06660g1.pdf]

## Electronic Supplementary Information

### **Dual role of the reactant MOH (M=Li, Na or K) in the growth of ZnO quantum dots under a sol-gel process: promoter and inhibitor**

Song Li, Song Ye\*, Tianhua Liu, Zhuang Guo, Huiyun Wang and Deping Wang

School of Materials Science and Engineering, Tongji University, Shanghai 201804,  
China

\*Corresponding author

E-mail address: [yesong@tongji.edu.cn](mailto:yesong@tongji.edu.cn) (S. Ye)

Tel: +86-21-69584723

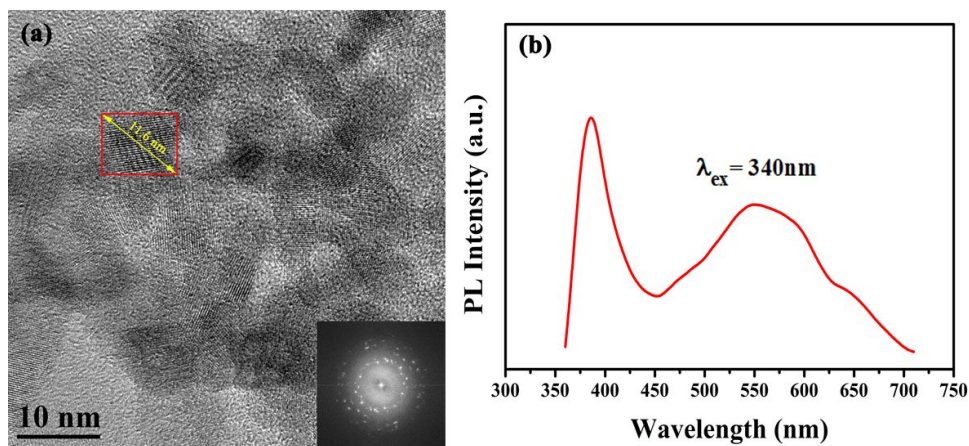

**Figure S1.** (a) HRTEM image and (b) PL spectrum of ZnO QDs synthesized in 1-pentanol using KOH as a base.

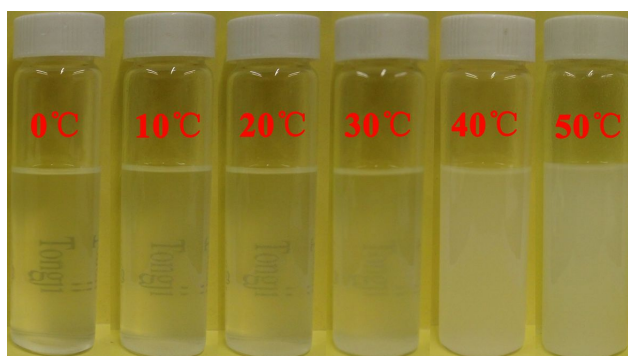

**Figure S2.** Images of 10 mmol LiOH added into 25 ml ethanol at different temperatures in the range of 0~50 °C.
